# Supplementary material for: Strength in numbers: achieving greater accuracy in MHC-I binding prediction by combining the results from multiple prediction tools
Source: PubMed Central journal article supplement (PMC1847428; doi:10.1186/1745-7580-3-5), 2007-03-24
Supplement: 1745-7580-3-5-S1.pdf [file 1745-7580-3-5-S1.pdf]

**Additional File 1:** List of HLA-A\*0201 binding and non-binding peptides gathered from the literature.

| Binders   |            |           | Nonbinders |            |           |
|-----------|------------|-----------|------------|------------|-----------|
| ALAIAALEL | ALGFCGHTV  | ALSLAAVLV | AFLSVKKQF  | AIVFDHYDV  | ALKNNGKVV |
| ALVEFEDVL | ASLSDPWL   | ATNQGRVEI | AMFQDPQER  | AVLVVMACL  | CFFCFKELE |
| ATVGIMIGV | CLTSTVQLV  | CQLAKTCPV | DIKMILKMV  | DLAQCFFCF  | DLFLKEGAC |
| CTPERMAEA | DLLSHAFFA  | DVWSFGILL | DLVFDECGI  | EAGFIHCPT  | ELCDNPFFA |
| FAFRDLCIV | FCFKELEGW  | FLARLHAAA | ELFPPLFMA  | ELTLGEFLK  | EPDLAQCFE |
| FLDPRPLTV | FLEGCACTP  | FLKDHRIST | FANSKFTLV  | FEELTLGEF  | FFCFKELEG |
| FLKLDRERA | FLWGPRALV  | FTLVAPVSI | FIFLLFLTL  | FLGGGGAGI  | FTCLPLGVL |
| FTSAVLLLV | GILGFVFTL  | GLCTLVAML | FVYVNGKKI  | GAPTLPPAW  | GITDDQLLA |
| GLIQLVEGV | GLKAGVIAV  | GLLFLHTRT | GLTFKPGA   | GLYDPDCDE  | GVLKMGQHL |
| GLLLAAATA | GTLGIVCPI  | HLYQGCQVV | GVQGGFVSA  | HACWPAFTV  | HRISTFKNW |
| IISLWDQSL | ILGELREKV  | ILHNGAYSL | IAKETNNKK  | IILNGSLLT  | IITTDNTFV |
| ILKEPVHGV | ILLRDAGLV  | ILPRKHHRI | ILLCCMTSC  | IVQENNGAV  | KALETDPVA |
| IMIGVLVGV | ISTFKNWPF  | KASEYLQLV | KDHRISTFK  | KHSSGCAFL  | KIAKETNNK |
| KIFGSLAPL | KIWEELSVL  | KLDREKAKN | KLPDDFMGC  | KMILKMVQL  | KVKRKKNVL |
| KLPQLCTEL | KLTPLCVTL  | KLVERLGAA | LAAVLVVMA  | LAQCFFCIK  | LLFNKVTLA |
| KLYCSYEVA | KNWPFLEGC  | KQFEELTLG | LLGLWGTA   | LLQYGSFC   | LLPRSDLAV |
| KVAELVHFL | KVRAIEQL   | KVVSLVILA | LLQYGSFCT  | LLTDDMIAA  | LLTTSQVSA |
| LIADFLSGL | LLDSAVQNL  | LLFTRYPDV | LLVGYNSA   | LPPAWQPFL  | LQTTIHDII |
| LLMGTLGIV | LLNATDIAV  | LLQAEAPRL | LVELAGQSL  | LVFDECGIT  | LVYVNGVVV |
| LLQYWSQEL | LMNNAFEWI  | LTLGEFLKL | MACLVPAAT  | MMSCSSEAT  | MTEQTDEAV |
| MAEAGFIHC | MGAPTLPPA  | MLDLQPETT | MTYTGGVMT  | NLPYVLAFL  | NVLLYNRLL |
| MMDAFILSA | MTSCVSEQL  | NLNESLIDL | PDLAQCFFC  | PLNPGPEAL  | PLQALLERA |
| NLTHVLYPV | QIIGYVIGT  | QLLALLPSL | PPAWQPFLK  | QCFFCFKEL  | QLDHGVLLV |
| QLQGYCASL | QVLAFLGILL | RAIEQLAAM | QLGREKGPI  | QTLKAMVQA  | QVHSSLSV  |
| RIDITLSSV | RIIYDRKFL  | RLAEYQAYI | RALSAAVL   | RIILNGSLL  | RLGSCPIV  |
| RLFVWVLLV | RLLSPTTIV  | RLNEVAKNL | RLHLWLSDM  | RLQSLQTYV  | RVFTSAVLL |
| RLQEWCSVI | RMAEAGFIH  | RVIEVLQRA | SGCAFLSVK  | SIEDLEVTC  | SIHVTVSNV |
| SIISAVVGI | SISALQSLL  | SLLQHLIGL | SILLRDAGL  | SLKRTGHGV  | SLSVVRPMT |
| SLVDVMPWL | SLYWSHEAL  | SMNATLVQA | SLVYVNGVV  | STEAQPFPI  | STHCSGSPV |
| SSGCAFLSV | STCWCVNTA  | STFKNWPFL | STSRVPYDI  | TMNKSQSV   | TVTTITVYA |
| SVFRENFL  | TLAKFSPYL  | TLGEFLKLD | VAVNGPVAV  | VLNDILSRL  | VLRLCKKLL |
| TLGIVCPIC | TLHEYMLDL  | TLLYATVEV | VLYQDVNCT  | VTCTWKLPT  | VTLPTGQCL |
| TLPPAWQPF | VLDGLDVLL  | VLYGPDTP  | VVAGIVVLV  | VVFLHVITYV | VVVIADVAG |
| VMACLVPAA | VMMSCSSEA  | WIIKNSWTA | VVYENQKQI  | WAFSAIGNV  | WIVQENNGA |
| WLQYFPNPV | WLSDCGEAL  | WLWYIKIFI | WMTYTGGVM  | WPFLEGCAC  | WTVWSGNRA |
| YLHARLREL | YLSGANLNL  | YMLDLQPET | YACFVSNLA  | YATVEVPSL  | YVCGIQNSV |
