# Supplementary material for: Strength in numbers: achieving greater accuracy in MHC-I binding prediction by combining the results from multiple prediction tools
Source: PubMed Central journal article supplement (PMC1847428; doi:10.1186/1745-7580-3-5), 2007-03-24

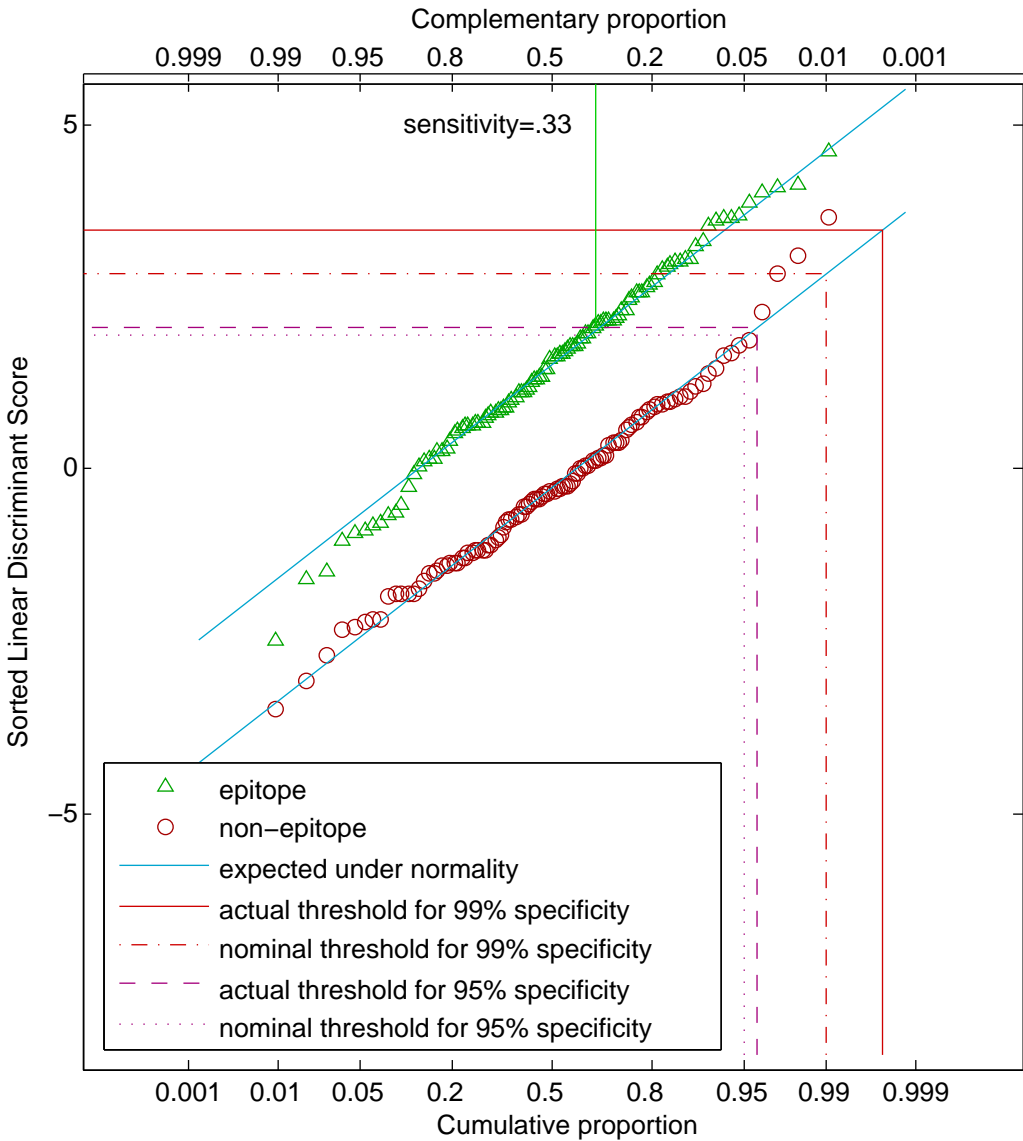

Supplement: 1745-7580-3-5-S4.pdf [file 1745-7580-3-5-S4.pdf]
